# Supplementary material for: Current Advances in Humanized Mouse Models for Studying NK Cells and HIV Infection
Source: MDPI journal article supplement (doi:10.3390/microorganisms11081984), 2023-08-02
Supplement: s1 [file s1]

**Supplemental Table S1.** Full name of mouse strains

| Abbreviated name    | Mouse strains                                                                                                                                                                                                                                       |
|---------------------|-----------------------------------------------------------------------------------------------------------------------------------------------------------------------------------------------------------------------------------------------------|
| NSG                 | NOD.Cg- <i>Prkdc</i> <sup>scid</sup> <i>Il2rg</i> <sup>tm1Wjl</sup> /SzJ                                                                                                                                                                            |
| NRG                 | NOD.Cg- <i>Rag</i> <sup>1tm1Mom</sup> <i>Il2rg</i> <sup>tm1Wjl</sup> /SzJ                                                                                                                                                                           |
| NOG                 | NOD.Cg- <i>Prkdc</i> <sup>scid</sup> <i>Il2rg</i> <sup>tm1Sug</sup> /JicTac                                                                                                                                                                         |
| BRG                 | C;129S4- <i>Rag</i> <sup>2tm1.1Flv</sup> <i>Il2rg</i> <sup>tm1.1Flv</sup> /J                                                                                                                                                                        |
| SRG                 | <i>SIRPA</i> <sup>h/m</sup> <i>Rag</i> <sup>2-/-</sup> <i>Il2rg</i> <sup>-/-</sup>                                                                                                                                                                  |
| TKO                 | B6.129S- <i>Rag</i> <sup>2tm1Fwa</sup> <i>CD47</i> <sup>tm1Fpl</sup> <i>Il2rg</i> <sup>tm1Wjl</sup> /J<br>C57BL/6. <i>Rag</i> <sup>-/-</sup> <i>γc</i> <sup>-/-</sup> <i>CD47</i> <sup>-/-</sup>                                                    |
| NSG-Tg(IL-15)       | NOD.Cg- <i>Prkdc</i> <sup>scid</sup> <i>Il2rg</i> <sup>tm1Wjl</sup> Tg(IL15)1Sz/SzJ                                                                                                                                                                 |
| NOG-EXL             | NOD.Cg <i>Prkdc</i> <sup>scid</sup> <i>Il2rg</i> <sup>tm1Sug</sup> Tg(SV40/HTLV-IL3,CSF2)10-7Jic/JicTac                                                                                                                                             |
| NSG-SMG3            | NOD.Cg- <i>Prkdc</i> <sup>scid</sup> <i>Il2rg</i> <sup>tm1Wjl</sup> Tg(CMV-IL3,CSF2,KITLG)1Eav/MloySzJ                                                                                                                                              |
| MISTRG              | C;129S4- <i>Rag</i> <sup>2tm1.1Flv</sup> <i>Csf1tm1</i> (CSF1) <i>Flv</i> <i>Csf2</i> / <i>Il3tm1.1</i> (CSF2,IL3) <i>Flv</i> <i>Thpo</i> <sup>tm1.1</sup> (TPO) <i>Flv</i> <i>Il2rg</i> <sup>tm1.1Flv</sup> Tg( <i>SIRPA</i> )1Flv/J               |
| SRG-15              | Balb/c x 129 <i>Rag</i> <sup>2-/-</sup> <i>Il2rg</i> <sup>-/-</sup> <i>hSIRPA</i> KI <i>hIL15</i> KI                                                                                                                                                |
| MISTRG-6-15         | <i>Rag</i> <sup>2-/-</sup> <i>Il2rg</i> <sup>-/-</sup> <i>MCSF</i> <sup>h/h</sup> <i>IL3</i> <sup>h/h</sup> <i>GMCSF</i> <sup>h/h</sup> <i>SIRPA</i> <sup>h/m</sup> <i>THPO</i> <sup>h/h</sup> <i>IL6</i> <sup>h/h</sup> <i>IL15</i> <sup>h/m</sup> |
| NOG-IL15            | NOD.Cg- <i>Prkdc</i> <sup>scid</sup> <i>Il2rg</i> <sup>tm1Sug</sup> Tg(CMV-IL2/IL15)1-1Jic/JicTac                                                                                                                                                   |
| hIL-7xhIL-15 KI NSG | NSG.CG-STOCK-IL7 <sup>tm1.1</sup> (IL7) <i>Rk</i> (IL15) <i>Rk</i>                                                                                                                                                                                  |
| NSG-SMG3-IL15       | NOD.Cg- <i>Prkdc</i> <sup>scid</sup> <i>Il2rg</i> <sup>tm1Wjl</sup> Tg(CMV-IL3,CSF2,KITLG)1Eav Tg(IL15)1Sz/J                                                                                                                                        |
